# Supplementary material for: Study of the post separation pH adjustment by a microchip for the analysis of aminoglycoside antibiotics
Source: Royal Society of Chemistry journal article supplement (doi:10.1039/c4ra10597d), 2014-01-01
Supplement: c4ra10597d1.pdf [file c4ra10597d1.pdf]

Supporting Information

**Study of post separation pH adjustment by microchip for analysis of aminoglycoside antibiotics**

Xiangying Meng<sup>1</sup>, Xingmei Suo<sup>2</sup>, Beiyuan Fan<sup>1</sup>, Yongliang Yu<sup>3</sup>, Yongsheng Ding<sup>1\*</sup>

Affiliation:

1 College of Life Sciences, University of Chinese Academy of Sciences, Beijing 100049, China

2 School of Information Engineering, Minzu University of China, Beijing 100081, China

3 School of Physics, University of Chinese Academy of Sciences, Beijing 100049, China

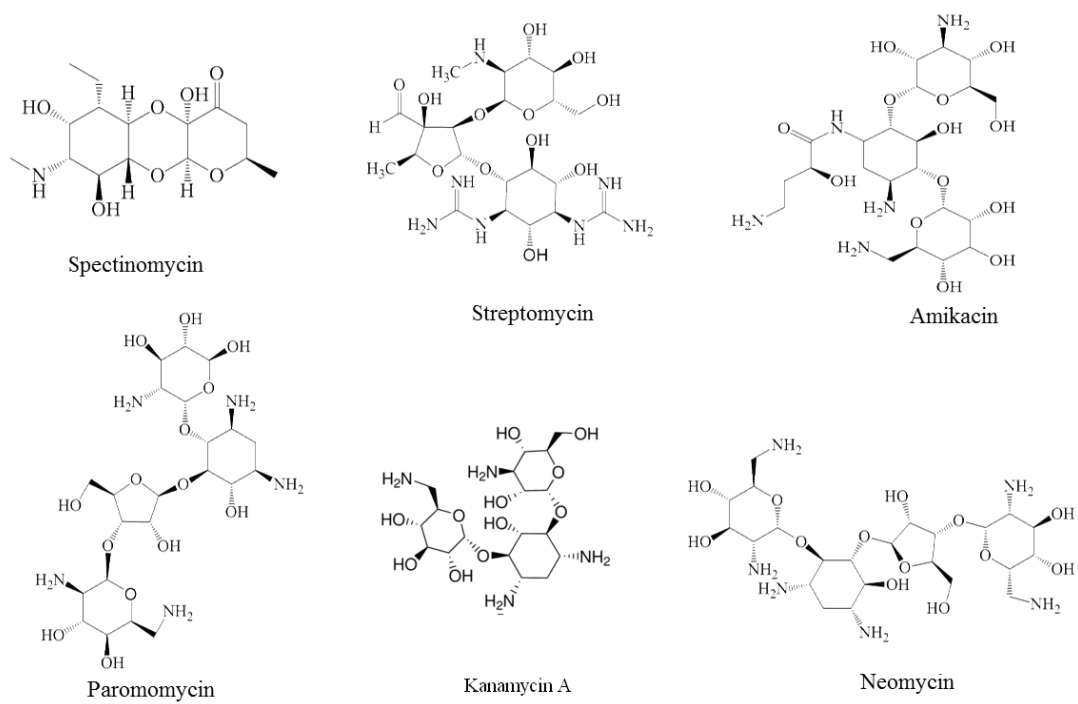

Figure S-1. Molecular structures of the selected AMGs

Table S-1. Analytical parameters (linear range, slope,  $R^2$ , and limit of detection) corresponding to the calibration curves obtained for the selected AGs

| AMG   | Linear range<br>( $\mu\text{M}$ ) | Slope<br>( $\text{nA}/\mu\text{M}$ ) | $R^2$ | Limit of detection<br>( $\mu\text{M}$ ) | Stability (n=30)<br>RSD % of $t_m / I_p$ |
|-------|-----------------------------------|--------------------------------------|-------|-----------------------------------------|------------------------------------------|
| SPE   | 1.0 – 100                         | 0.216                                | 0.997 | 0.5                                     | 1.1 / 3.5                                |
| STR   | 1.0 – 100                         | 0.482                                | 0.995 | 0.2                                     | 1.4 / 4.8                                |
| AMI   | 1.0 – 100                         | 0.497                                | 0.991 | 0.2                                     | 1.9 / 5.1                                |
| KAN A | 2.0 – 100                         | 0.295                                | 0.995 | 0.5                                     | 2.6 / 5.6                                |
| PAR   | 2.0 – 100                         | 0.296                                | 0.992 | 0.5                                     | 2.8 / 6.1                                |
| NEO   | 2.0 – 100                         | 0.208                                | 0.996 | 2.0                                     | 3.0 / 6.2                                |

$t_m$  = migration time;  $I_p$  = peak current
